# Supplementary material
Source: Springer Nature journal article supplement (https://www.springermedizin.de/resource/supplementary/12889_2008_1672_MOESM2_ESM.pdf/9503698)

**% proportion of seropositive students**

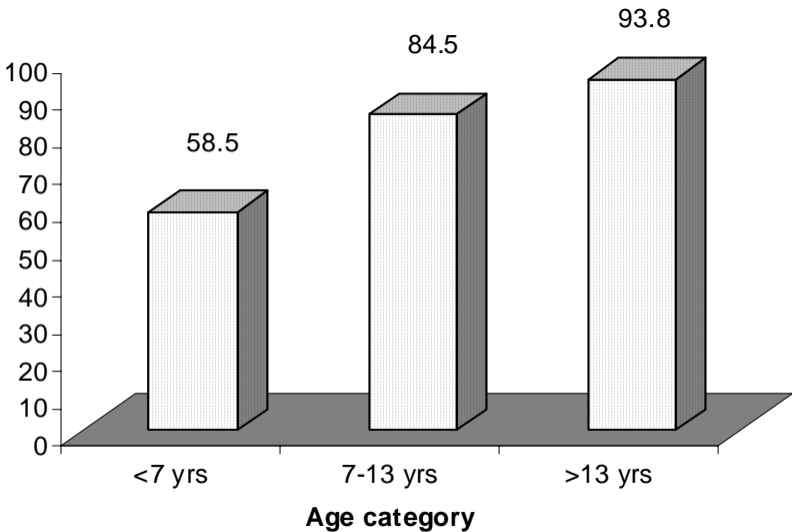

Supplement: MOESM2 [file 9503698]
